# Supplementary material for: Identification of a Programmed Cell Death-related Signature for Prediction of Osteosarcoma
Source: Research Square preprint supplement (doi:10.21203/rs.3.rs-326918/v1), 2021-03-24
Supplement: Supplementary file 1 [file 0ee01c8ba4044e11009b0d02.xlsx]

## Sheet: Sheet1
id	coef	HR	HR.95L	HR.95H	pvalue
MUC1	0.710671	2.03536	1.12501	3.68235	0.0188057
TCF7L2	0.706892	2.02768	1.27794	3.21727	0.00268915
TGFB2	-0.894533	0.408798	0.212477	0.786515	0.00737937
TRIAP1	0.822336	2.27581	1.35076	3.83438	0.00200429
CBS	0.495038	1.64056	1.20472	2.23408	0.00167748
